# Supplementary material for: Multi-Step Ahead Probabilistic Forecasting of Daily Streamflow Using Bayesian Deep Learning: A Multiple Case Study
Source: MDPI journal article supplement (doi:10.3390/w14223672), 2022-11-14
Supplement: s1 [file s1]

**Supplementary file**

**for**

**Multi-step ahead probabilistic forecasting of daily  
streamflow using Bayesian Deep Learning: A multiple  
case study**

**Fatemeh Ghobadi and Doosun Kang\***

*Department of Civil Engineering, Kyung Hee University, 1732 Deogyong-daero, Giheung-gu, Yongin-si  
17104, Republic of Korea*

*\* Correspondence: Tel: +82-31-201-2513; Email: doosunkang@khu.ac.kr*

## S1 Autocorrelation analysis

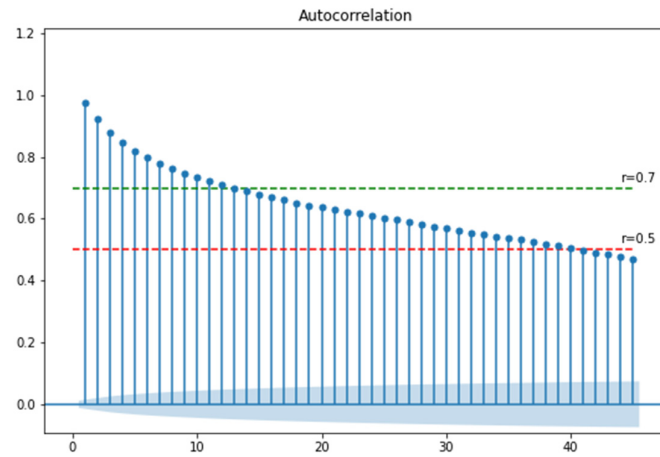

(a)

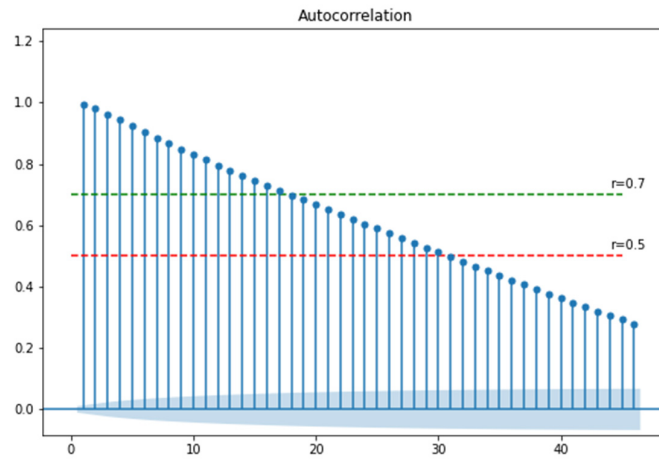

(b)

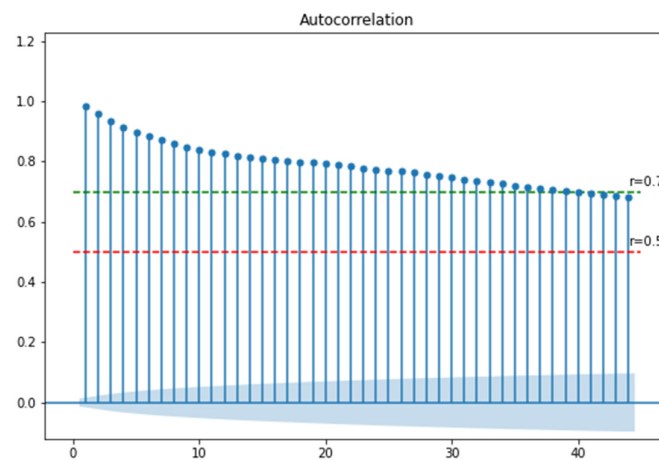

(c)

**Figure S1.** Autocorrelation function plots of transformed-streamflow timeseries: (a) case study I, (b) case study II, and (c) case study III.

## S2 Structure of the prediction models

**Table S1.** General structures of deep neural networks

| Model    | Network structure                                                                                                                                                                                                                                                                                                                                                                                                                                                                                                |
|----------|------------------------------------------------------------------------------------------------------------------------------------------------------------------------------------------------------------------------------------------------------------------------------------------------------------------------------------------------------------------------------------------------------------------------------------------------------------------------------------------------------------------|
| BLSTM    | BLSTM_Network(<br>(0): BayesianLSTM(<br>(weight_ih_sampler): TrainableRandomDistribution()<br>(weight_hh_sampler): TrainableRandomDistribution()<br>(bias_sampler): TrainableRandomDistribution()<br>(weight_ih_prior_dist): PriorWeightDistribution()<br>(weight_hh_prior_dist): PriorWeightDistribution()<br>(bias_prior_dist): PriorWeightDistribution()<br>)<br>(1): Linear(in_features=128, out_features=2, bias=True)<br>(Softplus): Softplus(beta=1, threshold=20)<br>(act): ReLU(inplace=True)<br>)<br>) |
| LSTM-BNN | LSTM_BayesianNetwork(<br>(0): LSTM(1, 128, num_layers=2, batch_first=True)<br>(1): BayesianLayer()<br>(2): BayesianLayer()<br>(Softplus): Softplus(beta=1, threshold=20)<br>(act): ReLU(inplace=True)<br>)<br>)                                                                                                                                                                                                                                                                                                  |
| BNN      | BayesianNetwork(<br>(0): BayesianLayer()<br>(1): BayesianLayer()<br>(2): BayesianLayer()<br>(Softplus): Softplus(beta=1, threshold=20)<br>(act): ReLU(inplace=True)<br>)<br>)                                                                                                                                                                                                                                                                                                                                    |
| LSTM-MC  | LSTM_MontCarloNetwork(<br>(0): LSTM(1, 128, num_layers=2, batch_first=True)<br>(1): LSTM(128, 32, num_layers=2, batch_first=True)<br>(fc): Linear(in_features=32, out_features=2, bias=True)<br>(Softplus): Softplus(beta=1, threshold=20)<br>)<br>)                                                                                                                                                                                                                                                             |

### S3 Graphical scheme of the prediction models

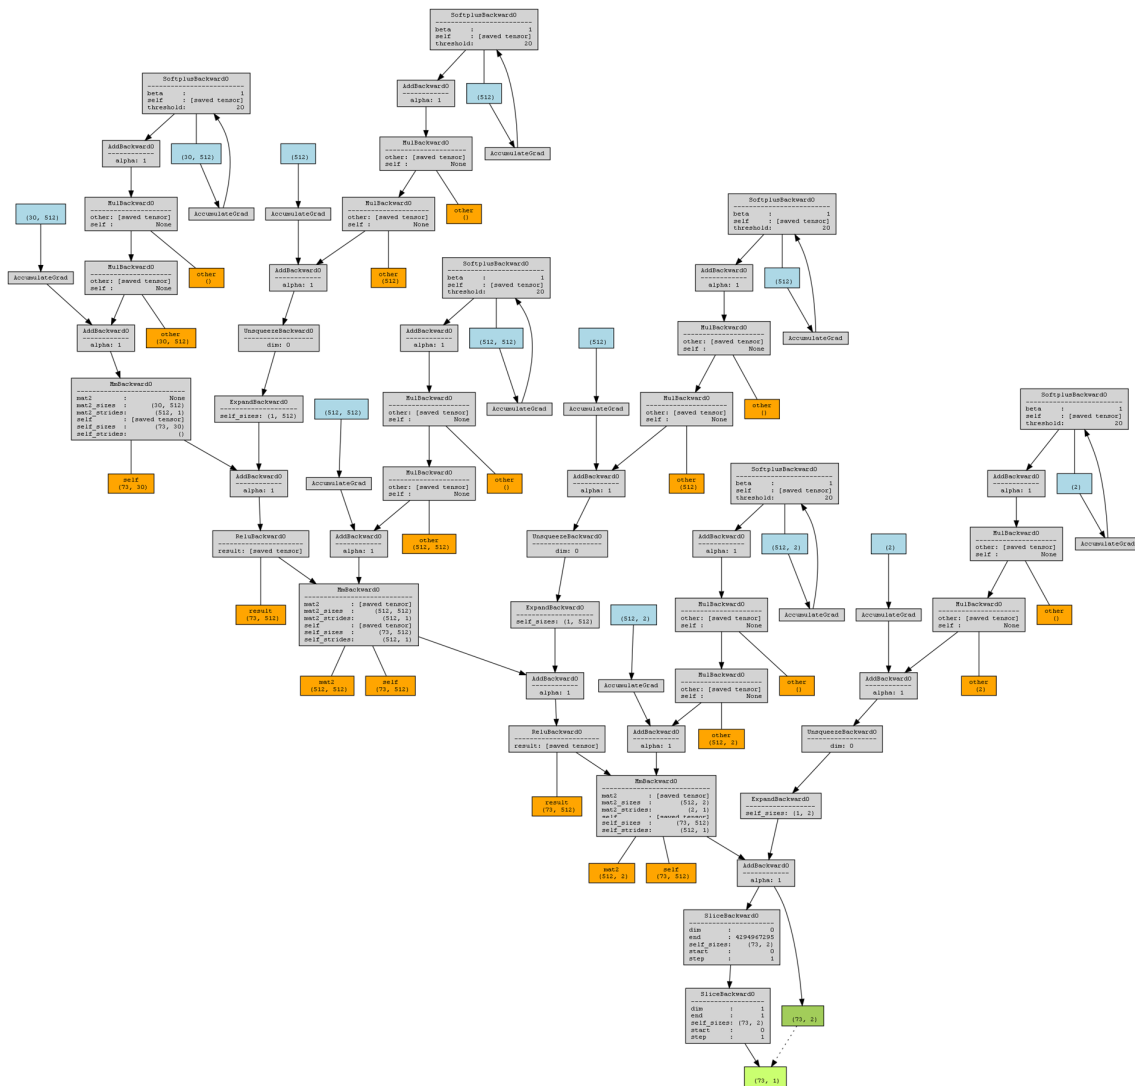

(a)

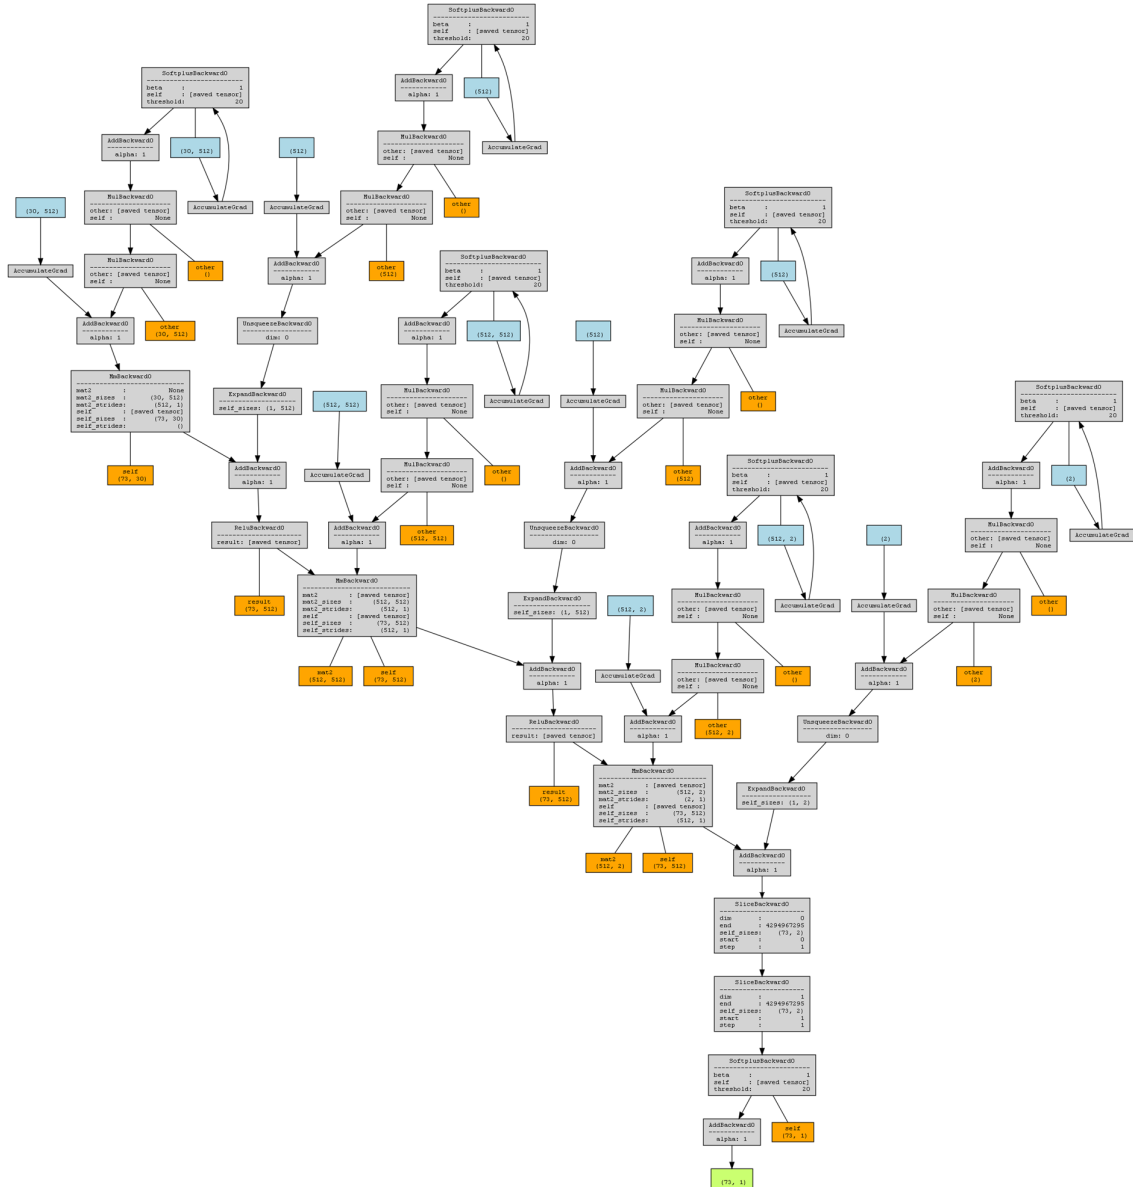

(b)

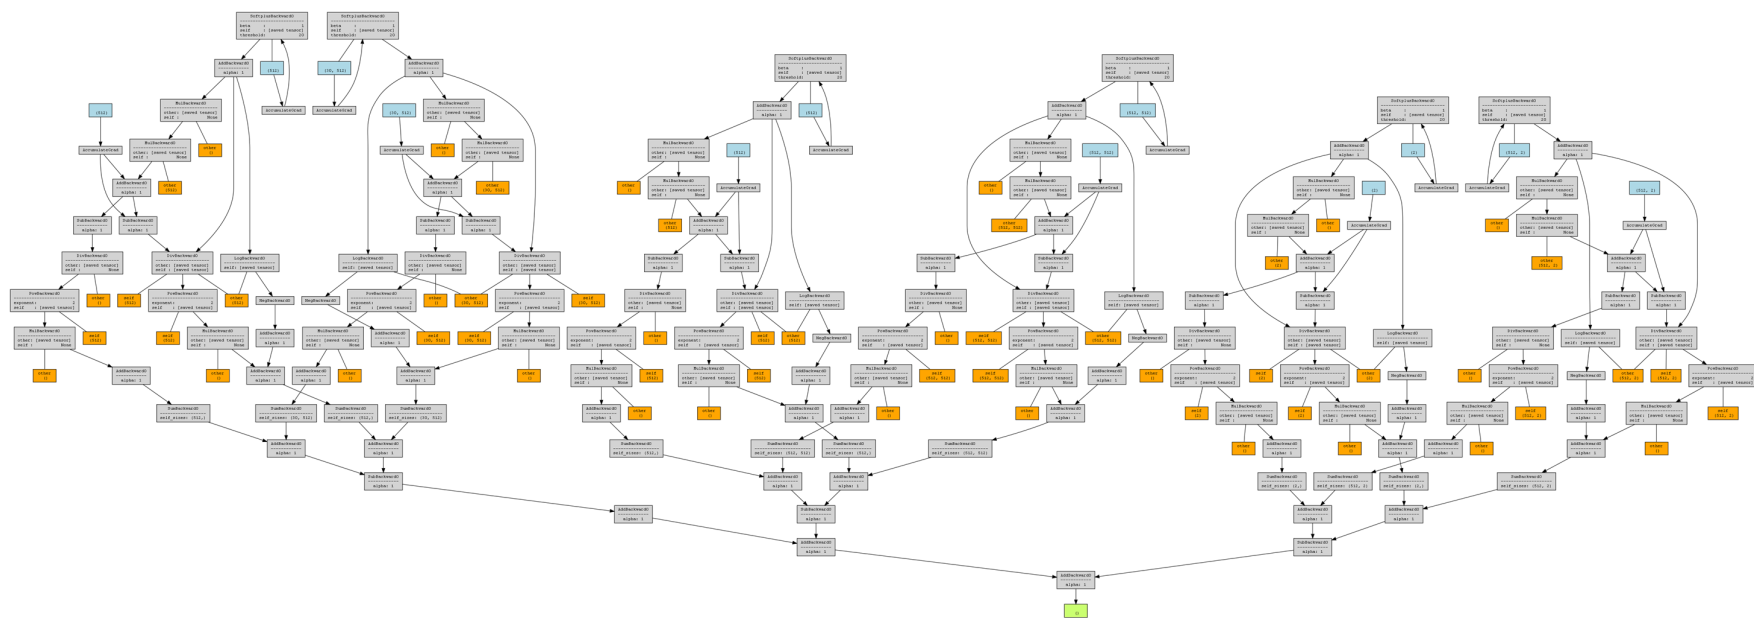

(c)

**Figure S2.** The visualizations of network execution graphs and traces for BLSTM models' outputs: (a) mean of prediction, (b) standard deviation of prediction, and (c) loss function.

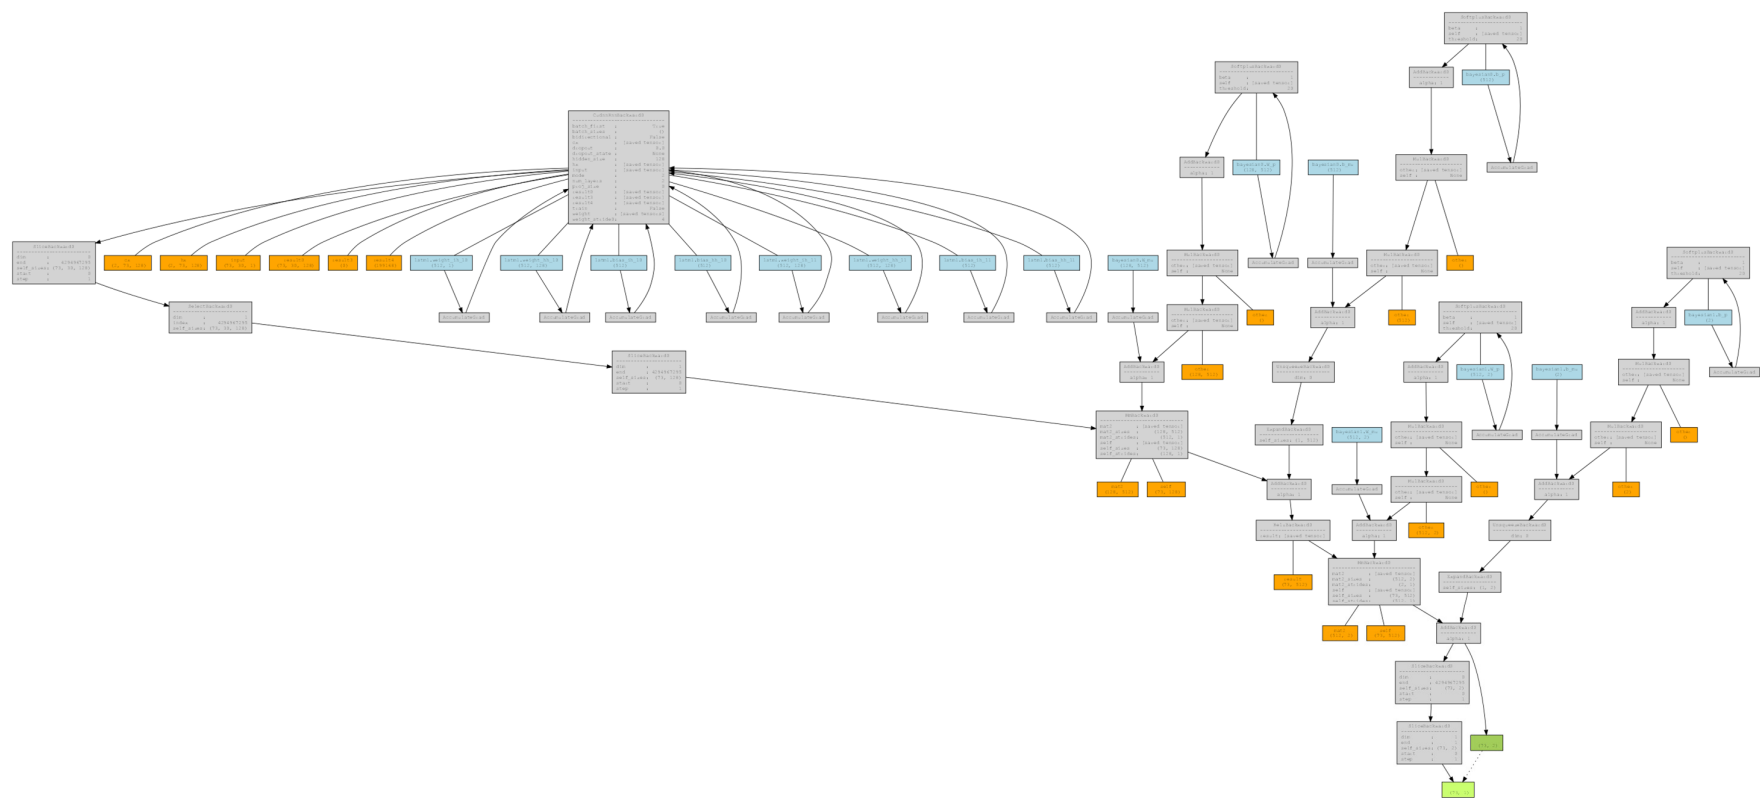

(a)

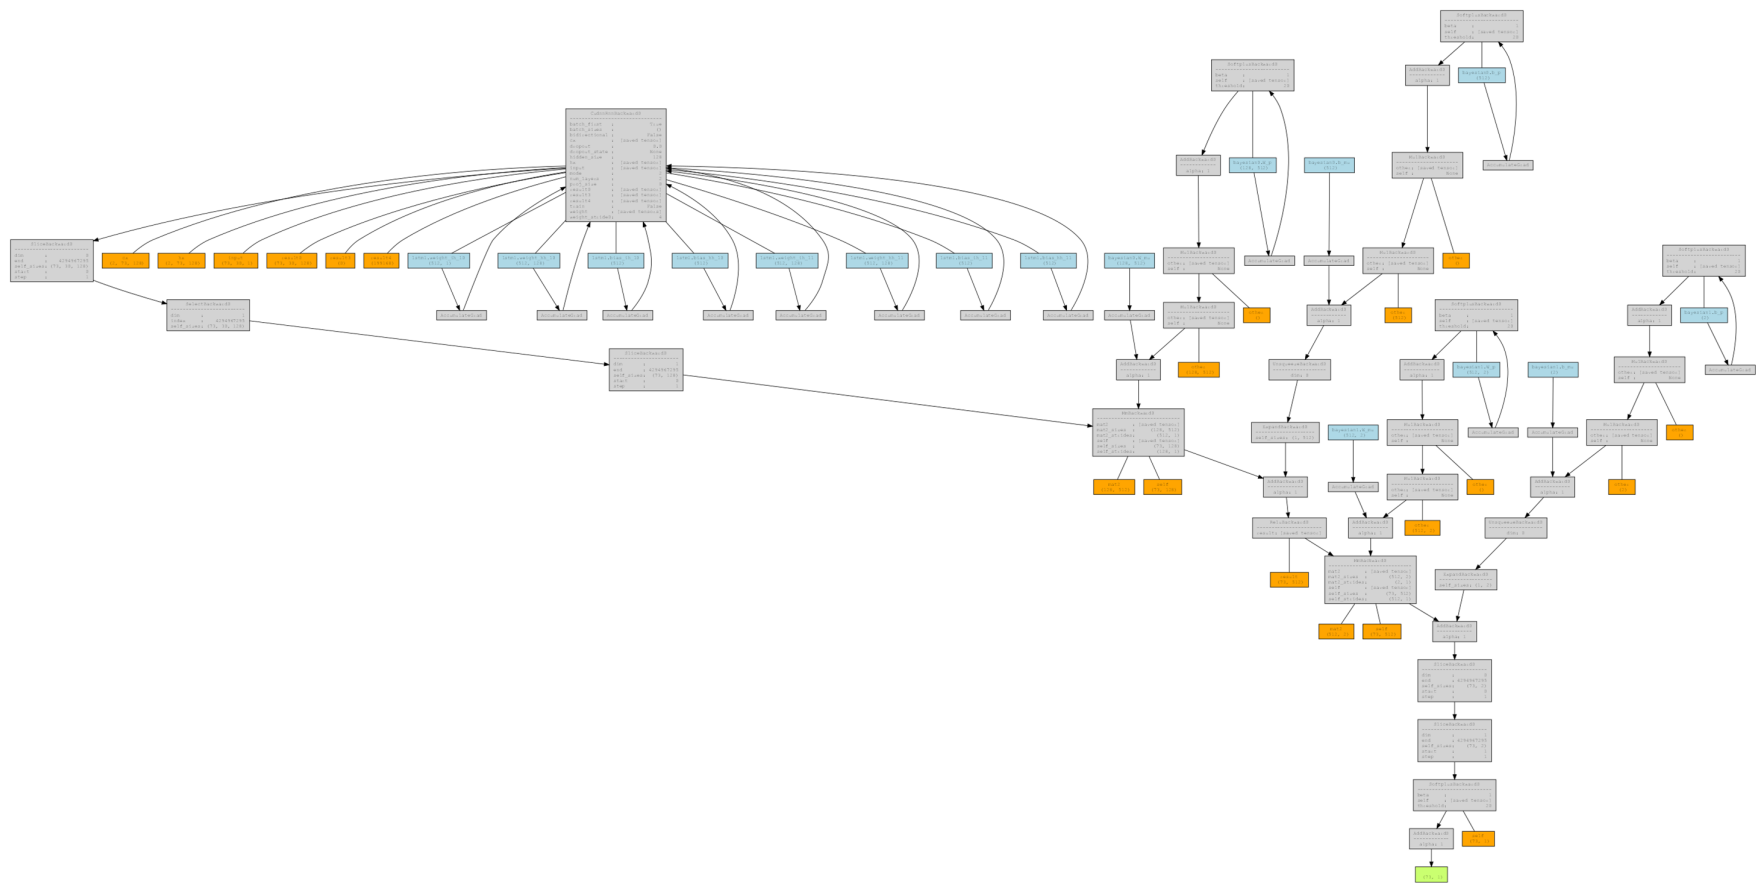

(b)





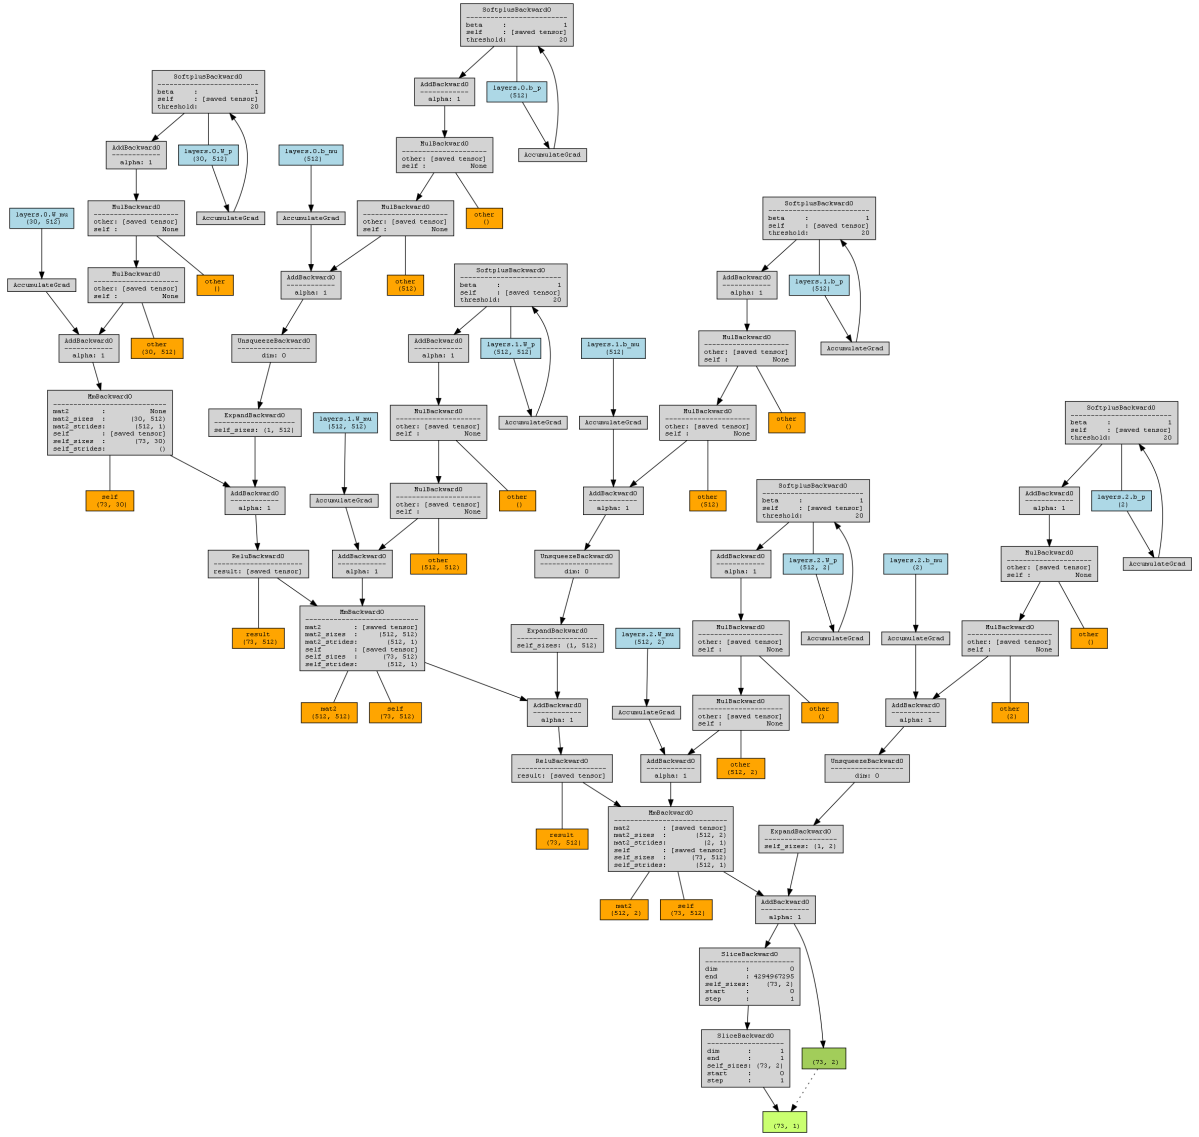

(a)

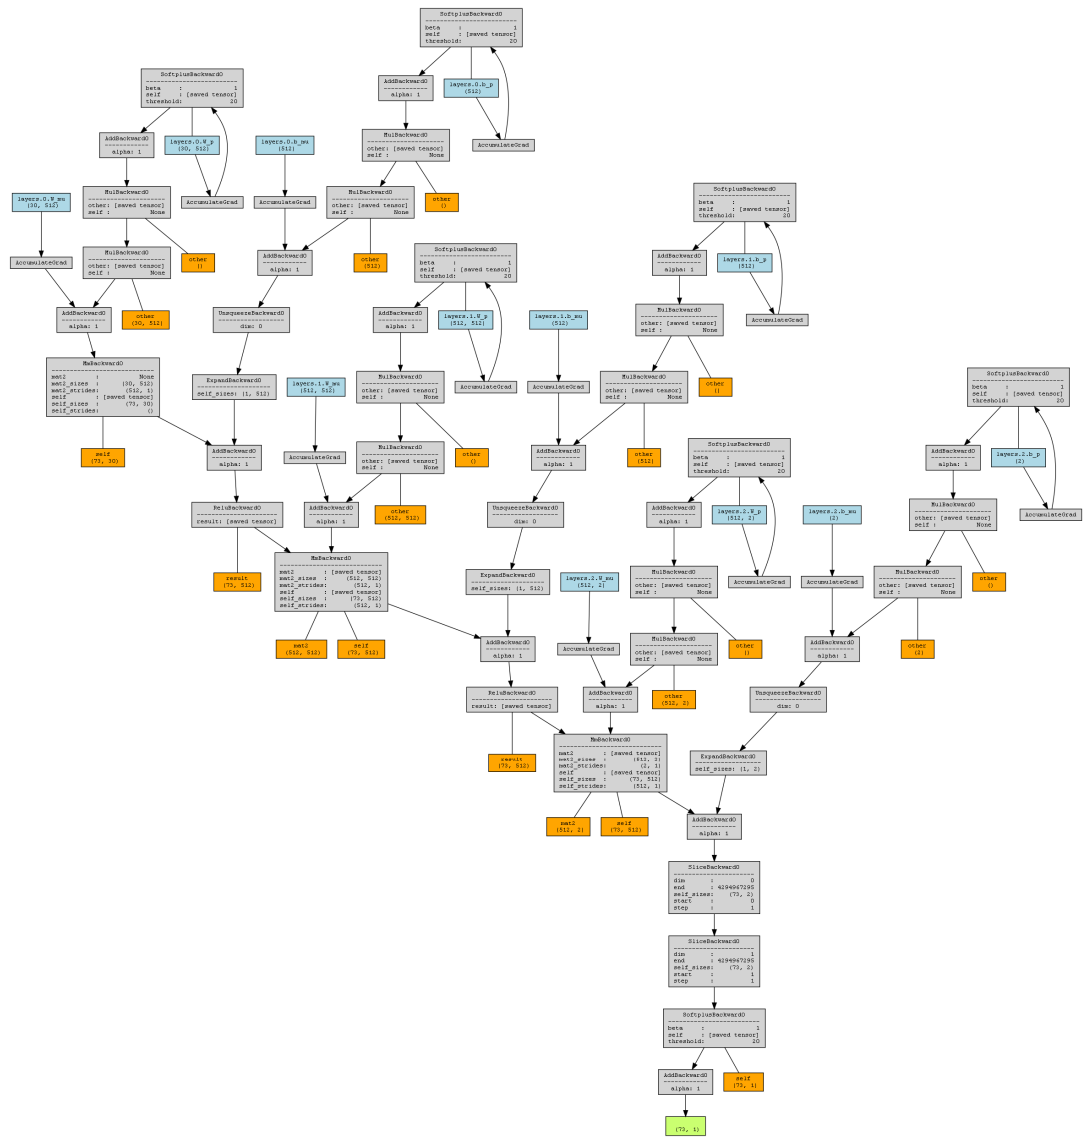

(b)

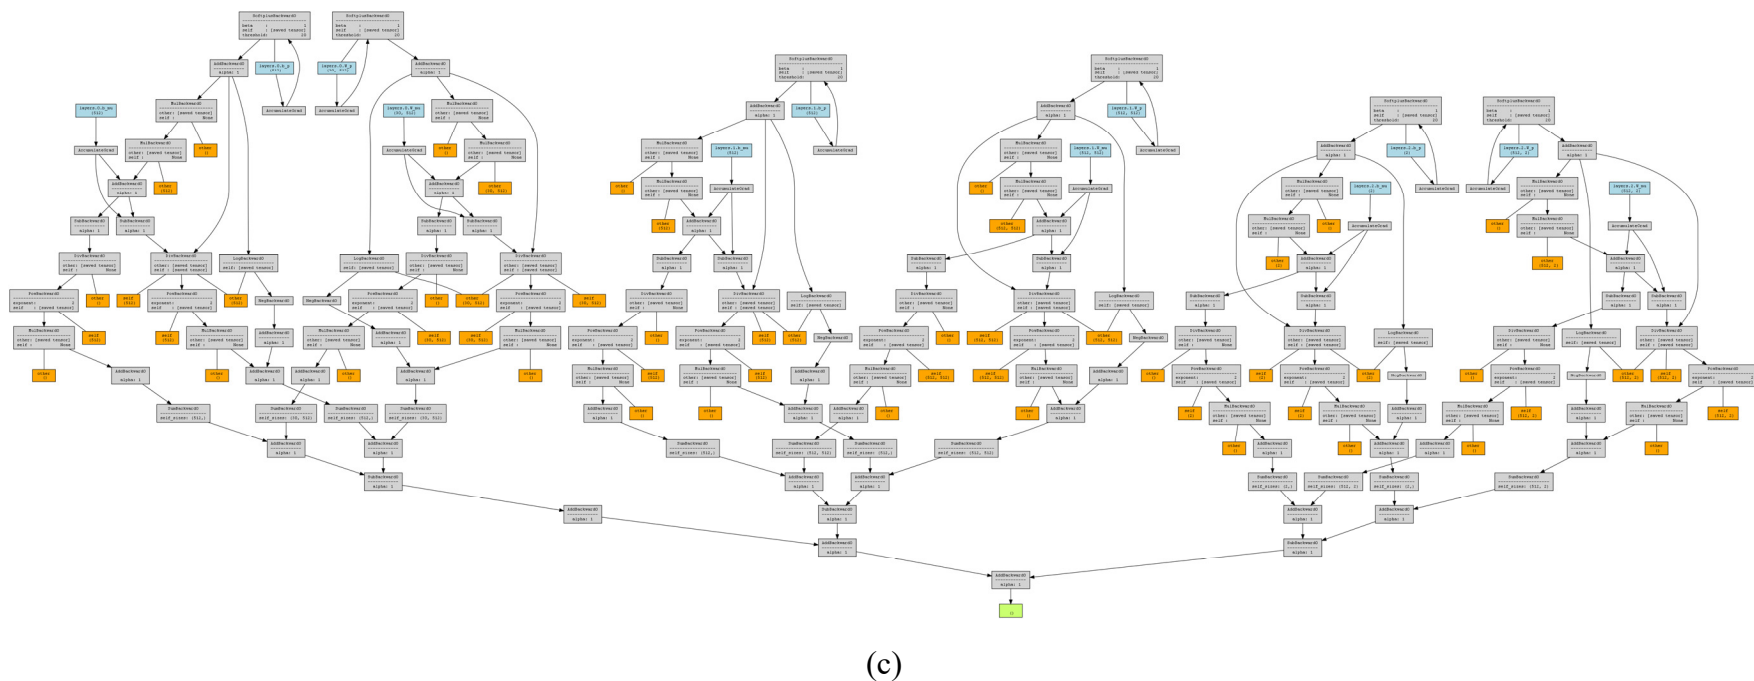

**Figure S4.** The visualizations of network execution graphs and traces for BNN models' outputs: (a) mean of prediction, (b) standard deviation of prediction, and (c) loss function.



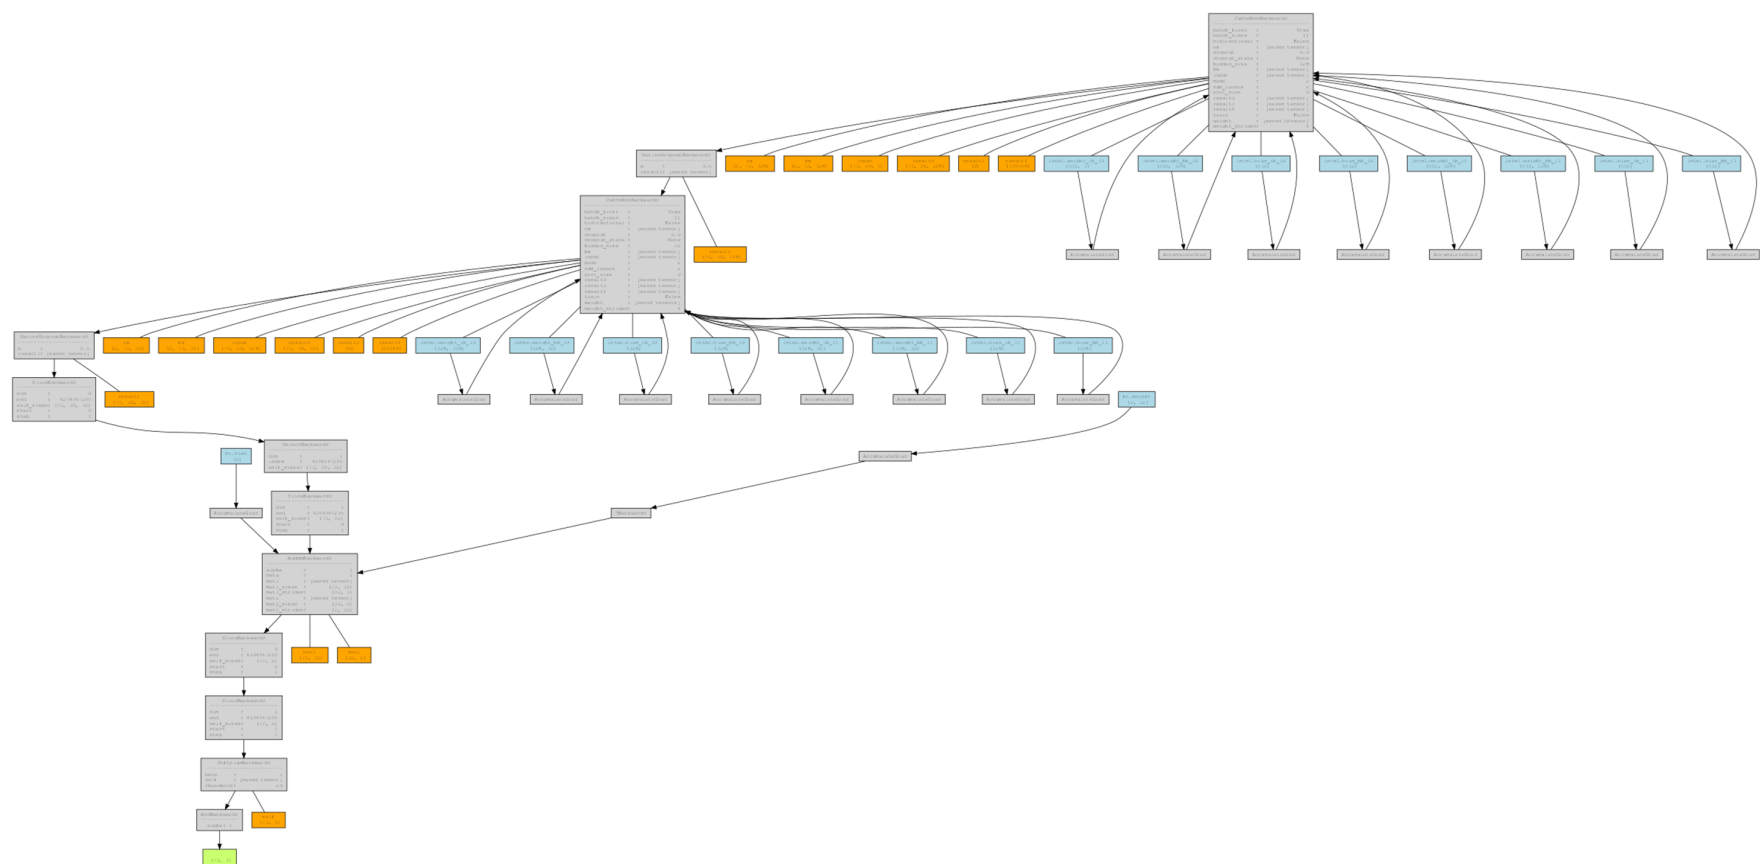

(b)

**Figure S5.** The visualizations of network execution graphs and traces for LSTM-MC models' outputs: (a) mean and (b) standard deviation of prediction.

**S4 Comparison of all the model performances for case study II in three scenarios**

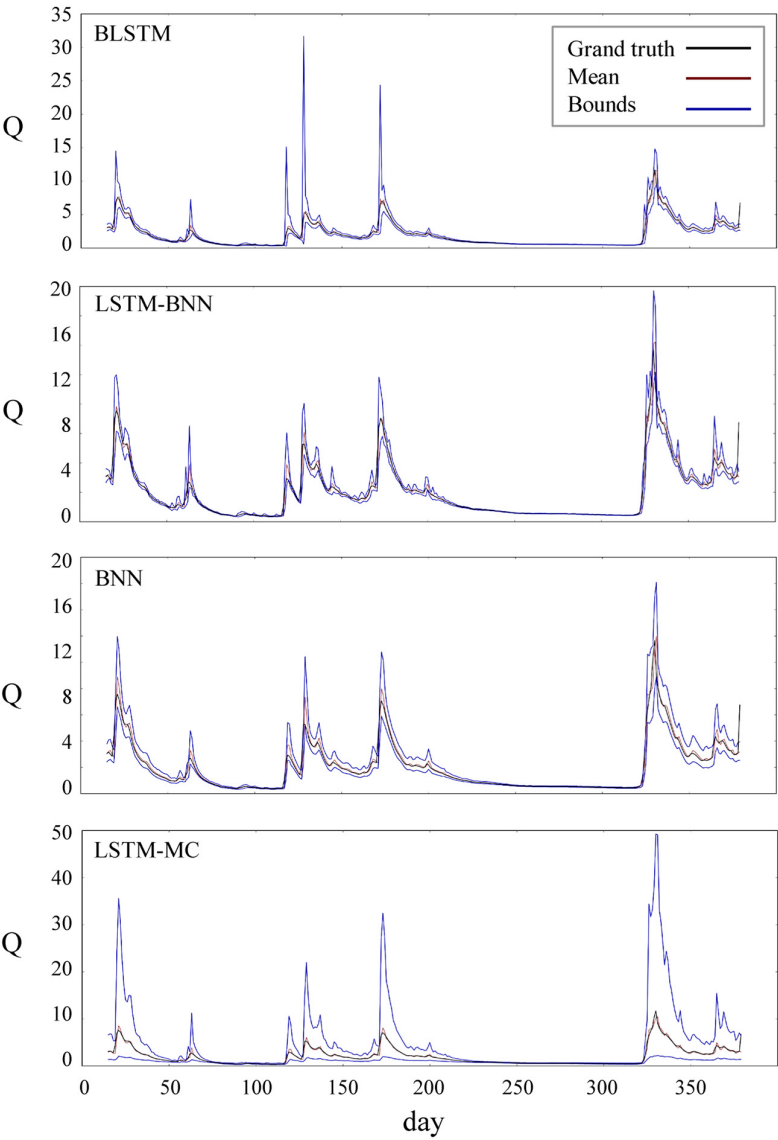

(a)

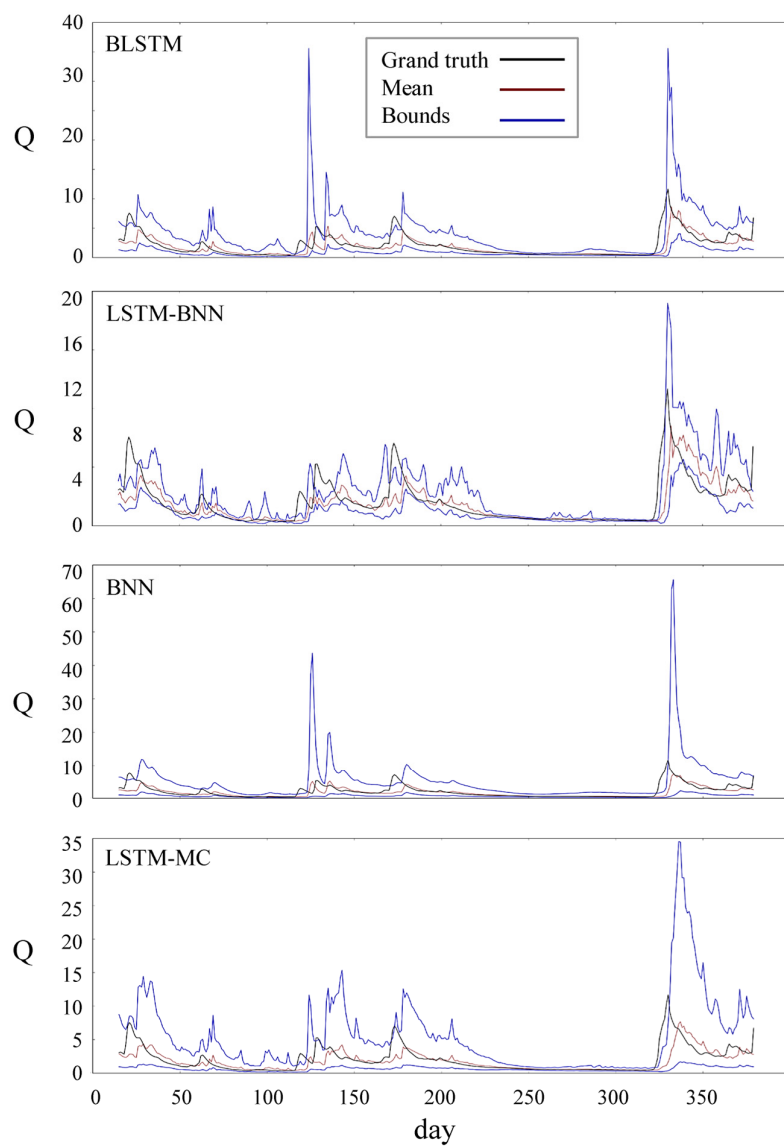

(b)



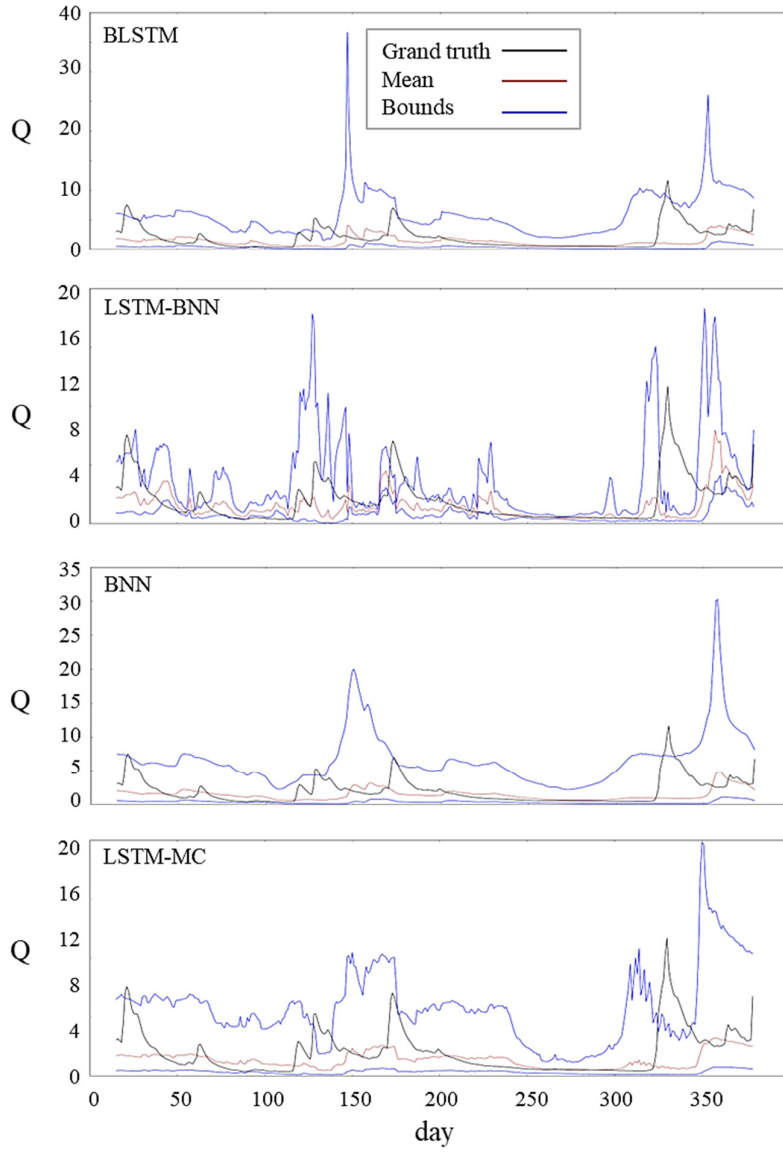

(c)

**Figure S6.** Prediction results of all models for case study II for (a) forecast horizon 1, (b) forecast horizon 7, and (c) forecast horizon 30.
